# Supplementary material for: Graphite-type activated carbon from coconut shell: a natural source for eco-friendly non-volatile storage devices
Source: PubMed Central journal article supplement — RSC Adv. 2021 Jan 13;11(5):2854–65. doi: 10.1039/d0ra09182k (PMC8693812; doi:10.1039/d0ra09182k), 2021-01-13
Supplement: RA-011-D0RA09182K-s001.pdf [file RA-011-D0RA09182K-s001.pdf]

Supporting information

## **Graphite-Type Activated Carbon from Coconut Shell: a Natural Source for Eco-friendly Non-volatile Storage Devices**

Nilanka M. Keppetipola,<sup>a</sup> Maithri Dissanayake,<sup>b</sup> Pubudu Dissanayake,<sup>b</sup> Buddhika Karunarathne,<sup>b</sup> Marie Anne Dourges,<sup>a</sup> David Talaga,<sup>a</sup> Laurent Servant,<sup>a</sup> Céline Olivier,<sup>a</sup> Thierry Toupance,<sup>a</sup> Satoshi Uchida,<sup>c</sup> Kirthi Tennakone,<sup>b,d</sup> G. R. Asoka Kumara,<sup>\*b</sup> Ludmila Cojocar<sup>\*a</sup>

<sup>a</sup> Université de Bordeaux, Institut des Sciences Moléculaires, UMR 5255 CNRS, 351 Cours de la Libération, F-33405 Talence Cedex, France

<sup>b</sup> National Institute of Fundamental Studies, Hantana Road, 20000 Kandy, Sri Lanka

<sup>c</sup> The University of Tokyo, Research Center for Advanced Science and Technology (RCAST), 4-6-1, Komaba, Meguro, Tokyo 153-8904, Japan

<sup>d</sup> Georgia State University, Department of Physics , Atlanta, USA

**Table S1** Configurations of the supercapacitors, precursors amount, materials for electrolyte, and current collectors used in this study.

| Active materials | Binders                |                        |                         | Current collectors       | Electrolytes                         | Separators                                |
|------------------|------------------------|------------------------|-------------------------|--------------------------|--------------------------------------|-------------------------------------------|
|                  | Activated carbon (wt%) | PVP <sup>a</sup> (wt%) | PVDF <sup>b</sup> (wt%) |                          |                                      |                                           |
| 96               | 4                      | -                      | -                       | FTO <sup>d</sup>         | 6 M KOH                              | Filter paper <sup>g</sup>                 |
| 96               | 4                      | -                      | -                       | FTO <sup>d</sup>         | 1.5 M H <sub>2</sub> SO <sub>4</sub> | Filter paper <sup>g</sup>                 |
| 85               | -                      | 10                     | 5                       | Ti plates <sup>e</sup> , | 1.5 M H <sub>2</sub> SO <sub>4</sub> | Filter paper <sup>g</sup>                 |
| 85               | -                      | 10                     | 5                       | Expanded graphite        | 1.5 M H <sub>2</sub> SO <sub>4</sub> | Filter paper <sup>g</sup>                 |
| 85               | -                      | 10                     | 5                       | Expanded graphite        | Pure MPPyFSI <sup>f</sup>            | Filter paper or Polyethylene <sup>h</sup> |

Binders: <sup>a</sup>Polyvinylpyrrolidone (PVP) Mw 8000, Alfa Aesar; <sup>b</sup>Polyvinylidene fluoride (PVDF) Alfa Aesar; <sup>c</sup>carbon black, Alfa Aesar; Current collectors: <sup>d</sup>SnO<sub>2</sub>:F (FTO), Solaronix; <sup>e</sup>Ti plates, The Nilaco Corporation; Ionic Liquids electrolytes: <sup>f</sup>1-Methyl-1-propyl-pyrrolizium bis(fluorosulfonyl)imide (MPPyFSI), IL-120, Dai-ichi kogyo seiyaku co., ltd ; Separators: <sup>g</sup>Watman filter paper; <sup>h</sup>SETELA, polyethylene film Toray Industries Inc.

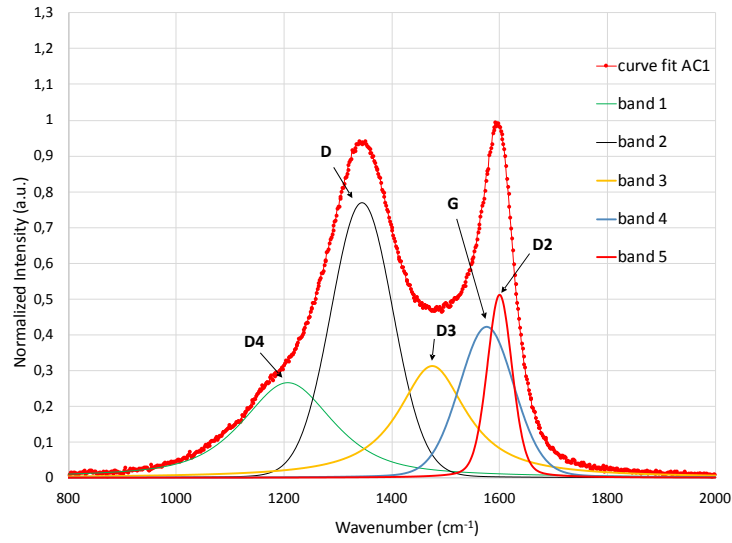

**Fig. S1** Normalized Raman spectra and curve fit of activated carbon AC1. A similar fitting band combination was used for all the activated carbon samples.

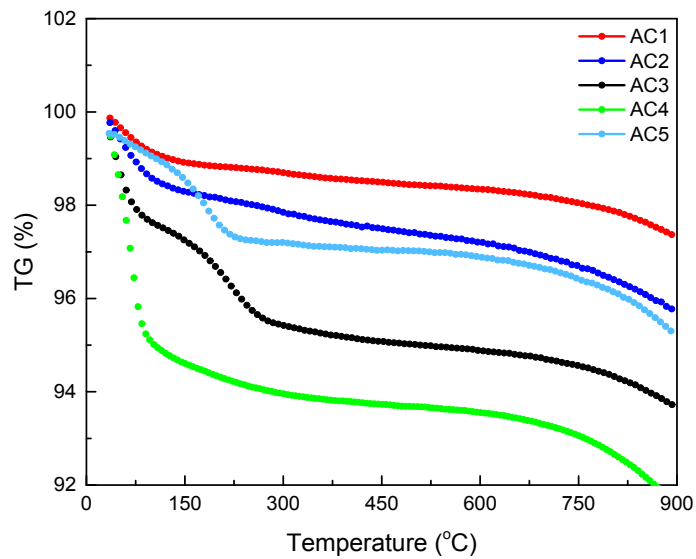

**Fig. S2** TG thermograms for the activated carbon AC1-AC5.

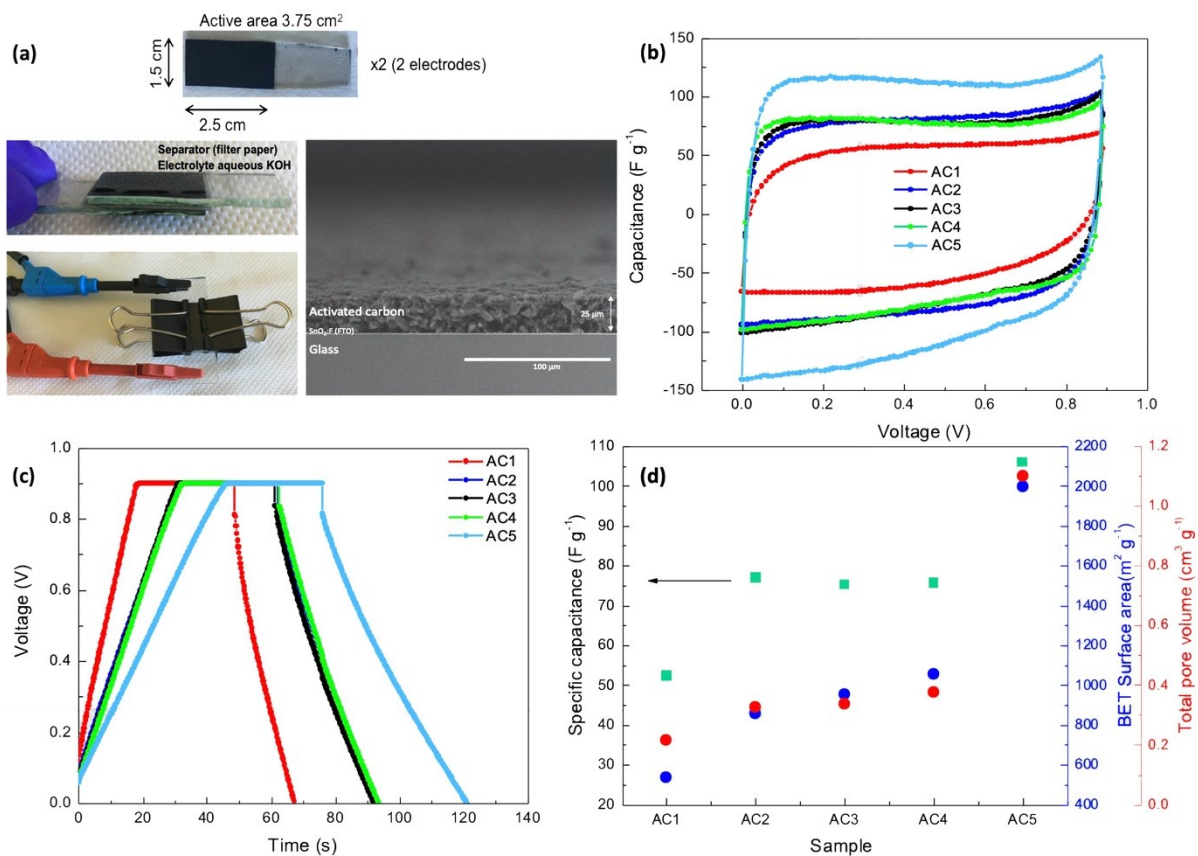

**Fig. S3** a) Digital photograph of the supercapacitor based on activated carbon electrodes prepared for this study and the cross-sectional view of the electrode based on activated carbon. b) Cyclic voltammograms measured for the supercapacitors with the FTO:AC-KOH-filter paper-KOH-AC:FTO configuration based on different activated carbon electrodes (AC1-AC5) at 5 mV s<sup>-1</sup> scan rate. c) Charge-discharge curves for the supercapacitors with the FTO:AC-KOH-filter paper-KOH-AC:FTO configuration based on different activated carbon electrodes (AC1-AC5) at 0.5 A g<sup>-1</sup> constant current. d) Specific capacitance calculated from the CV curves (green dots) versus BET surface area (blue dots) and total pore volume (red dots).

**Table S2** Calculated capacitance values for each activated carbon-based supercapacitor with the FTO:AC-KOH-filter paper-KOH-AC:FTO configuration, CV measured at 5 mV s<sup>-1</sup> scan rate and galvanostatic CD at specific current 0.5 A g<sup>-1</sup>.

| Samples | S <sub>BET</sub> , (m <sup>2</sup> g <sup>-1</sup> ) | C <sub>s</sub> (C <sub>d</sub> ) <sup>CV</sup> (F g <sup>-1</sup> ) | C <sub>s</sub> (C <sub>d</sub> ) <sup>CD</sup> (F g <sup>-1</sup> ) |
|---------|------------------------------------------------------|---------------------------------------------------------------------|---------------------------------------------------------------------|
| AC1     | 539±16                                               | 52.4 (13.1)                                                         | 42.4 (10.6)                                                         |
| AC2     | 858±25                                               | 76.9 (19.2)                                                         | 73.0 (18.3)                                                         |
| AC3     | 952±28                                               | 75.2 (18.8)                                                         | 69.0 (17.3)                                                         |
| AC4     | 1054±31                                              | 75.6 (18.9)                                                         | 71.2 (17.8)                                                         |
| AC5     | 1998±58                                              | 106 (26.5)                                                          | 106.0 (26.5)                                                        |

C<sub>s</sub>(C<sub>d</sub>)<sup>CV</sup> specific and device capacitance calculated from CV curves; C<sub>s</sub>(C<sub>d</sub>)<sup>CD</sup> specific and device capacitance calculated from CD curves.

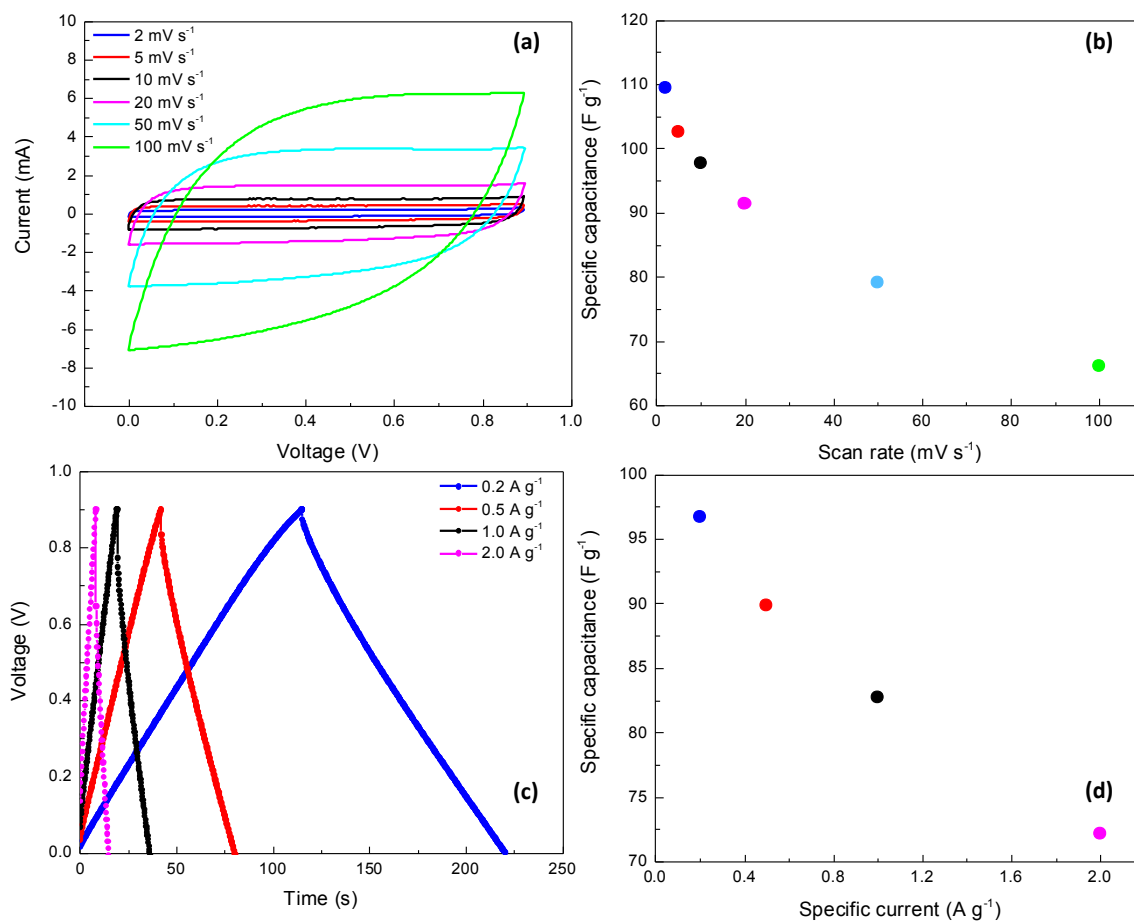

**Fig. S4** Electrochemical characterization of the supercapacitor based on AC5 electrodes with configuration FTO:AC5-KOH-filter paper-KOH-AC5:FTO (a) Cyclic voltammograms collected at scan rates between 2 and 100  $\text{mV s}^{-1}$ . (b) Specific capacitance calculated from cyclic voltammetry at different scan speeds. (c) Charging-discharging curves at different current densities. (d) Specific capacitance is calculated from charging-discharging curves at different current densities.

**Table S3** Calculated capacitance values for each activated carbon-based supercapacitor with the FTO:AC5-KOH-filter paper-KOH-AC5:FTO configuration, CV measured at different scan rates and galvanostatic CD at different specific current.

| Scan speed<br>mV s <sup>-1</sup> | C <sub>s</sub> (C <sub>d</sub> ) <sup>CV</sup><br>(F g <sup>-1</sup> ) | Specific current A g <sup>-1</sup> | C <sub>s</sub> (C <sub>d</sub> ) <sup>CD</sup><br>(F g <sup>-1</sup> ) |
|----------------------------------|------------------------------------------------------------------------|------------------------------------|------------------------------------------------------------------------|
| 2                                | 109.5 (27.4)                                                           | 0.2                                | 96.7 (24.2)                                                            |
| 5                                | 102.7 (25.7)                                                           | 0.5                                | 89.9 (22.5)                                                            |
| 10                               | 97.7 (24.4)                                                            | 1.0                                | 82.7 (20.7)                                                            |
| 20                               | 91.4 (22.8)                                                            | 2.0                                | 72.2 (18.0)                                                            |
| 50                               | 79.1 (19.8)                                                            |                                    |                                                                        |
| 100                              | 66.1 (16.5)                                                            |                                    |                                                                        |

C<sub>s</sub>(C<sub>d</sub>)<sup>CV</sup> specific and device capacitance calculated from CV curves; C<sub>s</sub>(C<sub>d</sub>)<sup>CD</sup> specific and device capacitance calculated from CD curves.

**Table S4** Simulated parameters based on the equivalent circuit shown in Figure 5a.

| Impedance parameters          | AC1                    | AC5                    | Units                          |
|-------------------------------|------------------------|------------------------|--------------------------------|
| S <sub>BET</sub> <sup>a</sup> | 539±16                 | 1998±58                | m <sup>2</sup> g <sup>-1</sup> |
| R <sub>1</sub>                | 23                     | 22                     | Ω                              |
| W                             | 16                     | 7.9                    | Ω s <sup>-1/2</sup>            |
| Q <sub>1</sub>                | 1.2x10 <sup>-4</sup>   | 32x10 <sup>-6</sup>    | F s <sup>n-1</sup>             |
| n                             | 0.79                   | 0.84                   | -                              |
| R <sub>a</sub>                | 0.5                    | 9.7                    | Ω                              |
| C <sub>1</sub>                | 16.2 x10 <sup>-4</sup> | 46.0 x10 <sup>-4</sup> | F g <sup>-1</sup>              |
| C <sub>3</sub>                | 10                     | 22                     | F g <sup>-1</sup>              |
| R <sub>3</sub>                | 249                    | 1668                   | Ω                              |
| C<br>at 10 <sup>-2</sup> Hz   | 44                     | 82                     | F g <sup>-1</sup>              |

\*The capacitance (C<sub>1</sub>) of the AC1 and AC5 was calculated from the impedance analysis using Q<sub>1</sub>, n and R<sub>a</sub>, the capacitance C<sub>3</sub> extracted from the impedance fitting and divided by the mass of activated carbon from the electrodes.

**Table S5** Calculated capacitance values for activated carbon AC5 based supercapacitor, CV measured at 5 mV s<sup>-1</sup> scan rate, and galvanostatic CD at specific current 0.5 A g<sup>-1</sup>.

| Supercapacitor configuration                          | ESR (Ω) | C <sub>s</sub> (C <sub>d</sub> ) <sup>CV</sup> (F g <sup>-1</sup> ) | C <sub>s</sub> (C <sub>d</sub> ) <sup>CD</sup> (F g <sup>-1</sup> ) | E (Wh kg <sup>-1</sup> ) | P (W kg <sup>-1</sup> ) |
|-------------------------------------------------------|---------|---------------------------------------------------------------------|---------------------------------------------------------------------|--------------------------|-------------------------|
| <b>1.5 M H<sub>2</sub>SO<sub>4</sub>:filter paper</b> |         |                                                                     |                                                                     |                          |                         |
| FTO glasses                                           | 22.9    | 105.9 (26.5)                                                        | 94.48 (23.6)                                                        | 2.6                      | 224.5                   |
| Expanded graphite                                     | 0.7     | 132.3 (33.1)                                                        | 118.0 (29.5)                                                        | 3.3                      | 225.1                   |
| Titanium plates                                       | 7.0     | 144.9 (36.2)                                                        | 123.0 (30.8)                                                        | 3.4                      | 225.4                   |

C<sub>s</sub>(C<sub>d</sub>)<sup>CV</sup> specific and device capacitance calculated from CV curves; C<sub>s</sub>(C<sub>d</sub>)<sup>CD</sup> specific and device capacitance calculated from CD curves. E and P calculated using device capacitance (C<sub>d</sub>)<sup>CD</sup>

**Table S6** Calculated capacitance values for activated carbon AC5 based supercapacitor with ionic liquid, CV measured at 5 mV s<sup>-1</sup> and galvanostatic CD at specific current of 1 A g<sup>-1</sup>.

| Supercapacitor configuration | ESR (Ω) | C <sub>s</sub> (C <sub>d</sub> ) <sup>CV</sup> (F g <sup>-1</sup> ) | C <sub>s</sub> (C <sub>d</sub> ) <sup>CD</sup> (F g <sup>-1</sup> ) | E (Wh kg <sup>-1</sup> ) | P (W kg <sup>-1</sup> ) |
|------------------------------|---------|---------------------------------------------------------------------|---------------------------------------------------------------------|--------------------------|-------------------------|
| <b>MPPyFSI:filter paper</b>  |         |                                                                     |                                                                     |                          |                         |
| FTO glasses                  | 58.3    | 153.8 (38.5)                                                        | 153.7 (38.4)                                                        | 65.4                     | 2123.0                  |
| Expanded graphite            | 22.7    | 224.5 (56.1)                                                        | 233.5 (58.4)                                                        | 99.3                     | 2267.6                  |
| Titanium plates              | 32.7    | 161.0 (40.3)                                                        | 170.9 (42.7)                                                        | 72.7                     | 2037.2                  |
| <b>MPPyFSI:polyethylene</b>  |         |                                                                     |                                                                     |                          |                         |
| Expanded graphite            | 4.3     | 219.4 (54.8)                                                        | 216.6 (54.1)                                                        | 92.1                     | 2046.9                  |

C<sub>s</sub>(C<sub>d</sub>)<sup>CV</sup> specific and device capacitance calculated from CV curves; C<sub>s</sub>(C<sub>d</sub>)<sup>CD</sup> specific and device capacitance calculated from CD curves. E and P calculated using device capacitance (C<sub>d</sub>)<sup>CD</sup>.

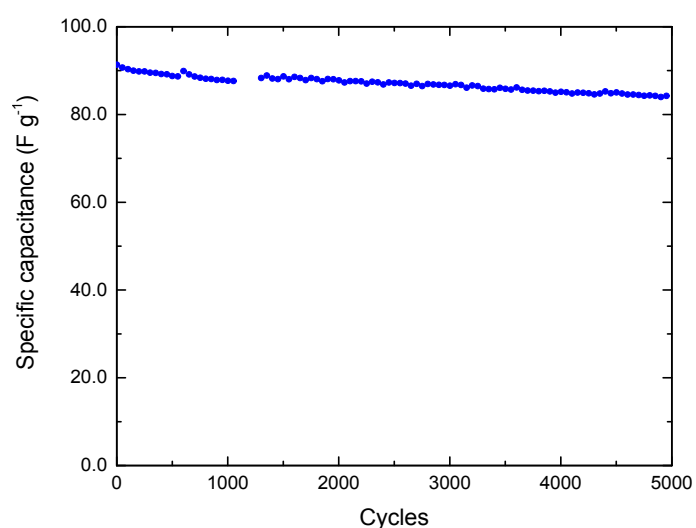

**Fig. S5** Stability tests of charging-discharging curves (1 V charging voltage, 1 A g<sup>-1</sup> discharge current) of sealed supercapacitor, Ti plates as electrodes, AC5 active material, filter paper as separator and ionic liquid MPPyFSI as electrolyte.
